# Supplementary material for: Twelve-Week Lower Trapezius-Centred Muscular Training Regimen in University Archers
Source: Healthcare (Basel). 2022 Jan 17;10(1):171. doi: 10.3390/healthcare10010171 (PMC8775688; doi:10.3390/healthcare10010171)
Supplement: Supplementary file 1 [file healthcare-10-00171-s001.zip]

Archive with 5 entries (5 files):
- Figure S1.jpg
- Table S1 Routine exercise protocol.pdf
- Table S2 Additional to routine exercise protocol.pdf
- Table S3 Participantsí» demographic characteristics.pdf
- Table S4 Muscle strength.pdf
