# Supplementary material for: Twelve-Week Lower Trapezius-Centred Muscular Training Regimen in University Archers
Source: Healthcare (Basel). 2022 Jan 17;10(1):171. doi: 10.3390/healthcare10010171 (PMC8775688; doi:10.3390/healthcare10010171)
Supplement: Supplementary file 1 [file healthcare-10-00171-s001.zip › Table S1 Routine exercise protocol.pdf]

Table S1. Routine exercise protocol

| Time                   | Monday                                                                             | Tuesday                                                                              | Wednesday                                                | Thursday                                                                                           | Friday                                                   | Saturday        | Sunday |
|------------------------|------------------------------------------------------------------------------------|--------------------------------------------------------------------------------------|----------------------------------------------------------|----------------------------------------------------------------------------------------------------|----------------------------------------------------------|-----------------|--------|
| 6:30-8:00              | Addition to routine exercise protocol for exercise group                           |                                                                                      | Addition to routine exercise protocol for exercise group |                                                                                                    | Addition to routine exercise protocol for exercise group | Rest            | Rest   |
| 8:30-11:30             | 1. Short-range archery × 150 sticks<br>2. 70 m × 108 sticks                        | 1. Simulation game × 2 (individual race)                                             | 1. Simulation game (individual race)                     | 1. Short-range archery × 150 sticks<br>2. 70 m × 144 sticks                                        | Self-adjustment                                          | Self-adjustment | Rest   |
| 13:30- End of training | 1. Short-range archery × 150 sticks<br>2. 70 m × 144 sticks<br>3. Jogging for 2 km | 1. Short-range archery × 150 sticks<br>2. Resistance training<br>3. Jogging for 2 km | 1. Simulation game (team competition)                    | 1. Short-range archery × 150 sticks<br>2. Simulation game (individual race)<br>3. Jogging for 2 km | Self-adjustment                                          | Rest            | Rest   |

Self-adjust: Training conducted according to the participant's individual needs (e.g., archery at 70 m, resistance training, and jogging).

Resistance training:

1. Two-handed dumbbell curl, two-handed dumbbell shoulder press, upright pull dumbbell, dumbbell one-arm rowing, barbell press, barbell squat. All dumbbell exercises: 15 reps, 3 sets.
2. Push-ups  $\times$  25, bend abdomen  $\times$  25, unilateral foot lift  $\times$  25, burpee  $\times$  25, bear crawl  $\times$  10 m.
3. Maintain the bowstring for 20 s  $\times$  6.
