# Supplementary material for: Twelve-Week Lower Trapezius-Centred Muscular Training Regimen in University Archers
Source: Healthcare (Basel). 2022 Jan 17;10(1):171. doi: 10.3390/healthcare10010171 (PMC8775688; doi:10.3390/healthcare10010171)
Supplement: Supplementary file 1 [file healthcare-10-00171-s001.zip › Table S2 Additional to routine exercise protocol.pdf]

Table S2. Additional to routine exercise protocol

| Period     | Name                                              | Frequency     | Intensity                        | Time                                                                     | Type                   |
|------------|---------------------------------------------------|---------------|----------------------------------|--------------------------------------------------------------------------|------------------------|
| 1-4 weeks  | Reverse fly                                       | 3 days a week | Elastic bands (Thera-Band Black) | 15 s per set, 5 sets per trial, with a 15-s rest between sets.           | Isometric contractions |
|            | Straight-arm pull-down                            |               | Elastic bands (Thera-Band Black) |                                                                          |                        |
|            | Reverse straight-arm pull-down                    |               | Elastic bands (Thera-Band Black) |                                                                          |                        |
|            | Straight-arm seated row                           |               | Elastic bands (Thera-Band Black) |                                                                          |                        |
|            | Locust pose                                       |               | Weight bearing                   |                                                                          |                        |
|            | Floor superman pose                               |               | Weight bearing                   |                                                                          |                        |
| 5–12 weeks | Reverse cable fly                                 | 3 days a week | 60% 1 RM                         | 15 repetitions per set, 5 sets per trial, with a 15-s rest between sets. | Resistance training    |
|            | Straight-arm pull-down                            |               | 60% 1 RM                         |                                                                          |                        |
|            | Reverse straight-arm pull-down                    |               | 60% 1 RM                         |                                                                          |                        |
|            | Straight-arm seated row                           |               | 60% 1 RM                         |                                                                          |                        |
|            | Straight-arm seated row and Y shape lat pull-down |               | 60% 1 RM                         |                                                                          |                        |
|            | Pull-ups                                          |               | Weight bearing                   | 15 s per set, 5 sets per trial, with a 15-s rest between sets.           | Isometric contractions |
|            | Pull-down                                         |               | Weight bearing                   |                                                                          |                        |
