# Supplementary material for: Twelve-Week Lower Trapezius-Centred Muscular Training Regimen in University Archers
Source: Healthcare (Basel). 2022 Jan 17;10(1):171. doi: 10.3390/healthcare10010171 (PMC8775688; doi:10.3390/healthcare10010171)
Supplement: Supplementary file 1 [file healthcare-10-00171-s001.zip › Table S3 Participantsí» demographic characteristics.pdf]

Table S3. Participants' demographic characteristics

|                          | Exercise group<br>(M = 3; F = 4) | Control group<br>(M = 2; F = 5) |
|--------------------------|----------------------------------|---------------------------------|
|                          | Mean ± SD                        | Mean ± SD                       |
| Age (year)               | 19 ± 1                           | 19 ± 1                          |
| Height (cm)              | 169 ± 9                          | 165 ± 6                         |
| Weight (kg)              | 73 ± 13                          | 67 ± 13                         |
| BMI                      | 25 ± 3                           | 24 ± 5                          |
| Years of training (year) | 8 ± 1                            | 6 ± 1                           |

M: Male; F: Female; BMI: body mass index ; SD: standard deviation
