# Supplementary material for: Twelve-Week Lower Trapezius-Centred Muscular Training Regimen in University Archers
Source: Healthcare (Basel). 2022 Jan 17;10(1):171. doi: 10.3390/healthcare10010171 (PMC8775688; doi:10.3390/healthcare10010171)
Supplement: Supplementary file 1 [file healthcare-10-00171-s001.zip › Table S4 Muscle strength.pdf]

Table S4. Muscle strength

| Exercise |              |                           | Pre-exercise |      | Post-exercise |        | ES   | ICC  | CV(%) | TE |
|----------|--------------|---------------------------|--------------|------|---------------|--------|------|------|-------|----|
|          |              |                           | Mean         | ± SD | Mean          | ± SD   |      |      |       |    |
| Exercise | Bow side     | Lower trapezius (kgf)     | 8            | ± 3  | 9             | ± 3 *  | 0.33 | 0.93 | 35    | 2  |
|          |              | Horizontal abductor (BW%) | 81           | ± 21 | 93            | ± 31 * | 0.45 | 0.87 | 30    | 5  |
|          |              | Horizontal adductor (BW%) | 81           | ± 28 | 83            | ± 30   | 0.07 | 0.99 | 34    | 5  |
|          | Drawing side | Lower trapezius (kgf)     | 9            | ± 3  | 9             | ± 3    | 0.01 | 0.91 | 33    | 2  |
|          |              | Horizontal abductor (BW%) | 86           | ± 19 | 93            | ± 26   | 0.31 | 0.93 | 25    | 5  |
|          |              | Horizontal adductor (BW%) | 79           | ± 30 | 83            | ± 36   | 0.12 | 0.97 | 39    | 6  |
| Control  | Bow side     | Lower trapezius (kgf)     | 8            | ± 2  | 8             | ± 2    | 0.01 | 0.97 | 23    | 1  |
|          |              | Horizontal abductor (BW%) | 79           | ± 18 | 88            | ± 21   | 0.46 | 0.87 | 23    | 4  |
|          |              | Horizontal adductor (BW%) | 81           | ± 18 | 77            | ± 22   | 0.20 | 0.92 | 25    | 4  |
|          | Drawing side | Lower trapezius (kgf)     | 8            | ± 2  | 7             | ± 2    | 0.50 | 0.87 | 27    | 1  |
|          |              | Horizontal abductor (BW%) | 88           | ± 13 | 88            | ± 17   | 0.01 | 0.92 | 17    | 4  |
|          |              | Horizontal adductor (BW%) | 85           | ± 15 | 81            | ± 24   | 0.20 | 0.83 | 23    | 4  |

BW: body weight; CV: coefficient of variation; ES: effect size; ICC: intraclass correlation coefficient; Kgf: kilogram-force; SD: standard deviation; TE: typical error

\*  $P \leq 0.05$  between pre- and post-exercise
